# Supplementary material for: Electrosprayed cysteine-functionalized degradable amphiphilic block copolymer microparticles for low pH-triggered drug delivery
Source: Royal Society of Chemistry journal article supplement (doi:10.1039/c9py01221d), 2019-01-01
Supplement: c9py01221d1.pdf [file c9py01221d1.pdf]

## Supporting Information

### Electrosprayed cysteine-functionalized degradable amphiphilic block copolymer microparticles for low pH-triggered drug delivery

Marie Finnegan, Gerard Mallon, Adam Leach and Efrosyni Themistou\*

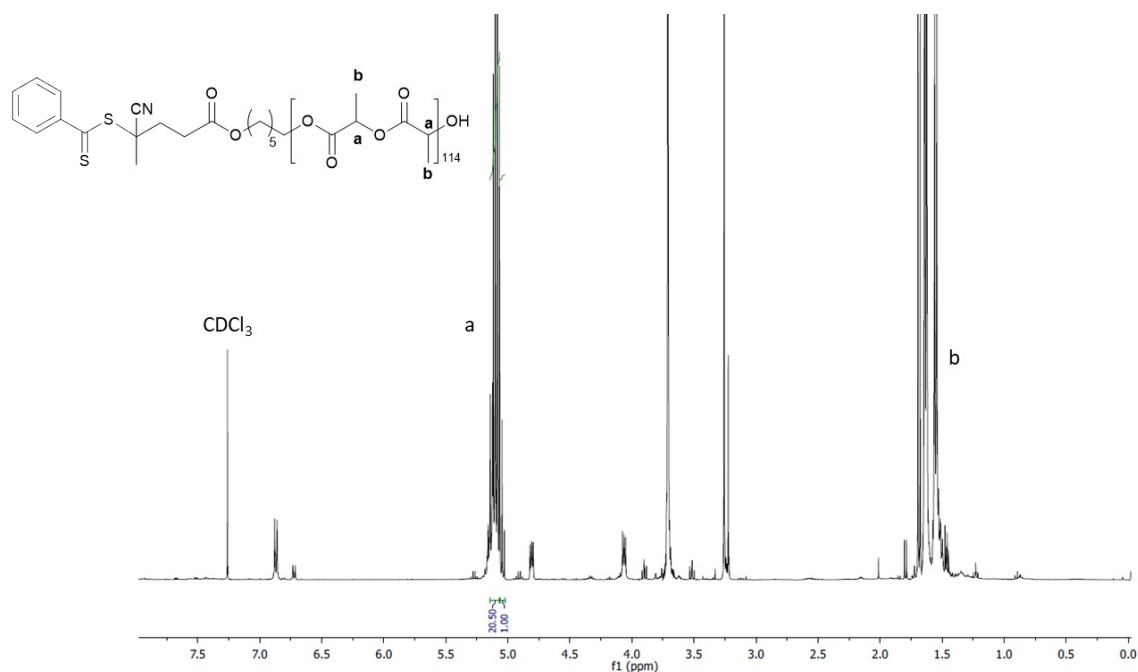

**Figure S1.** <sup>1</sup>H NMR (CDCl<sub>3</sub>) spectrum of the reaction product for the synthesis of the PLA<sub>114</sub> homopolymer.

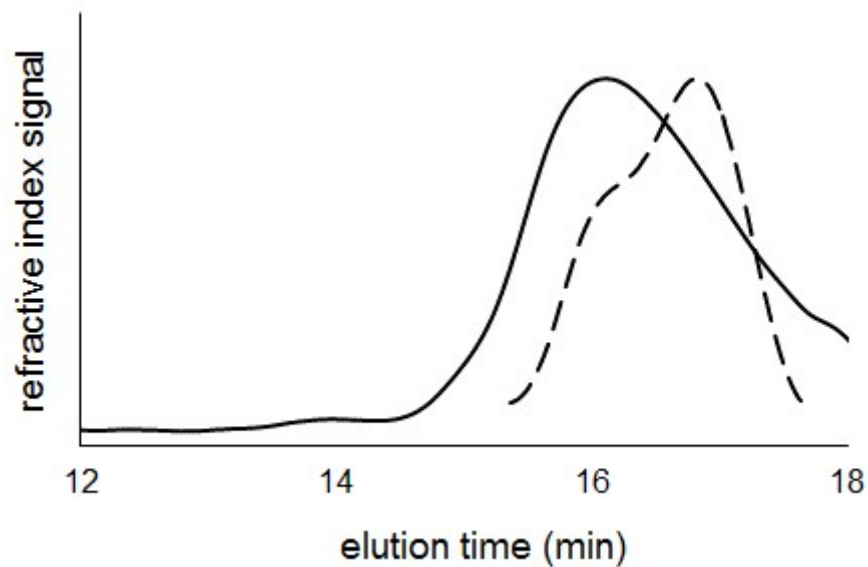

**Figure S2.** SEC (THF) chromatograms of PLA<sub>114</sub> homopolymer (dashed line) and PLA<sub>114</sub>-*b*-P(MPC<sub>17</sub>-*st*-NHSMA<sub>2</sub>) amphiphilic diblock copolymer (solid line).

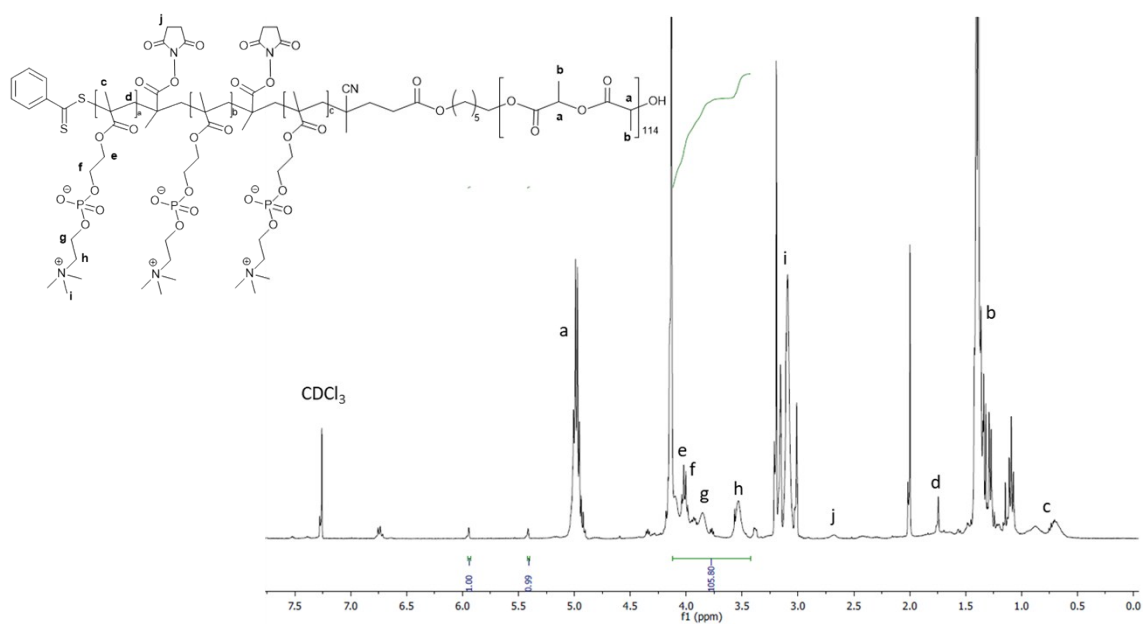

**Figure S3.** <sup>1</sup>H NMR (CDCl<sub>3</sub>/CD<sub>3</sub>OD 3/1 v/v) spectrum of the reaction product for the synthesis of the PLA<sub>114</sub>-*b*-P(MPC<sub>17</sub>-*st*-NHSMA<sub>2</sub>) amphiphilic diblock copolymer.

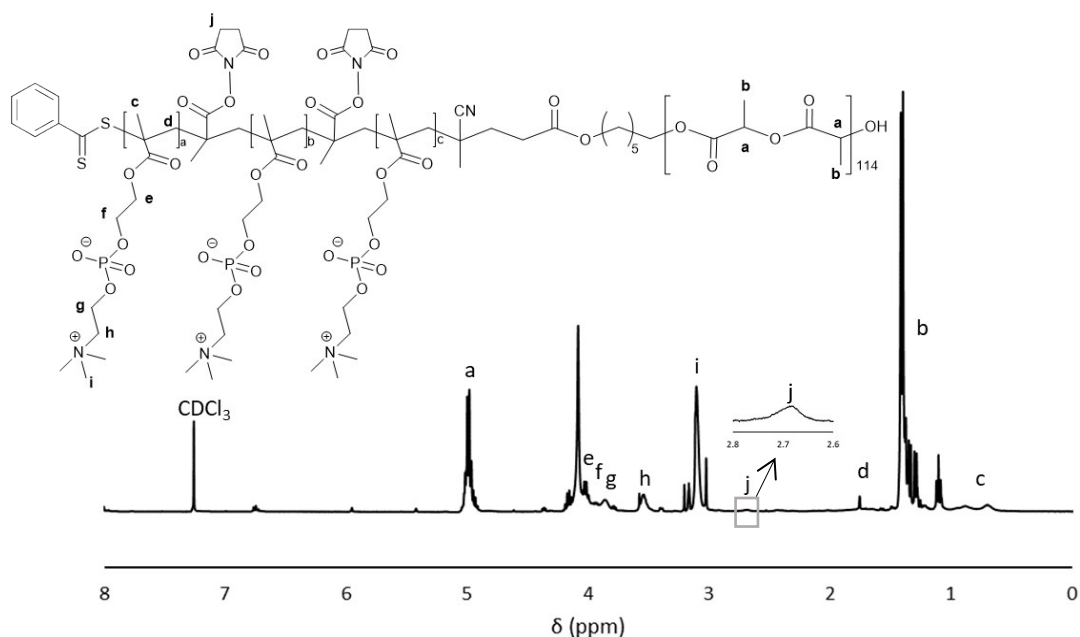

**Figure S4.**  $^1\text{H}$  NMR ( $\text{CDCl}_3/\text{CD}_3\text{OD}$  3/1 v/v) spectrum of the  $\text{PLA}_{114}\text{-}b\text{-P}(\text{MPC}_{17}\text{-}st\text{-NHSMA}_2)$  amphiphilic diblock copolymer after purification by dialysis.

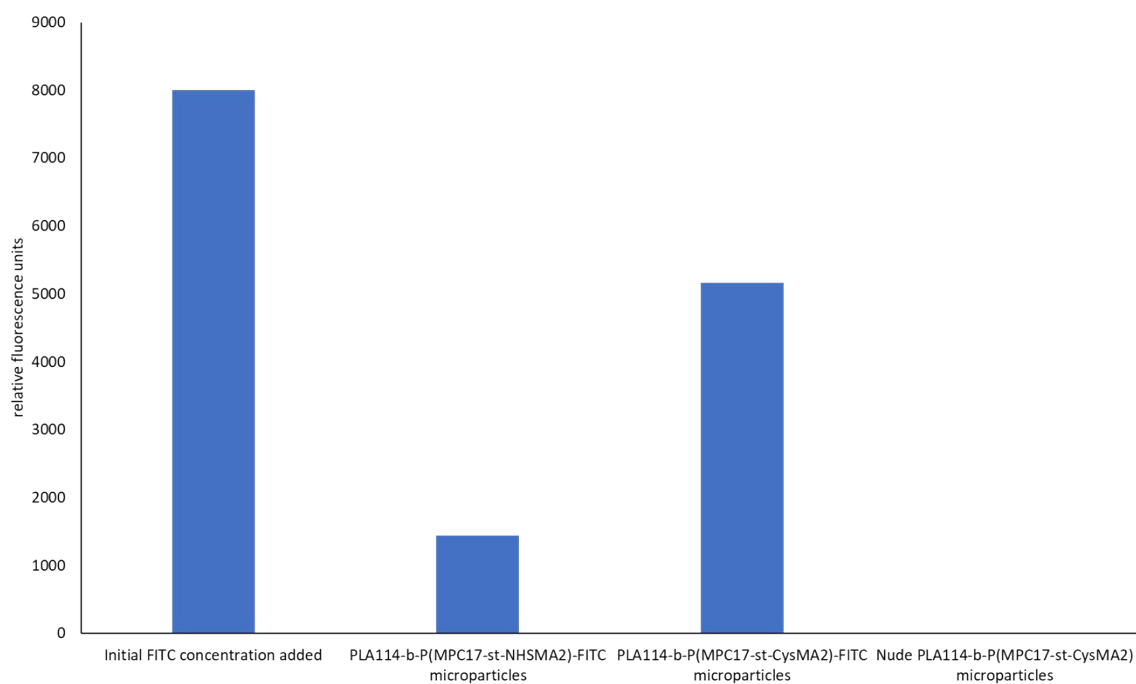

|                                                                                                           | relative fluorescence units |
|-----------------------------------------------------------------------------------------------------------|-----------------------------|
| initial FITC concentration added                                                                          | 8000                        |
| $\text{PLA}_{114}\text{-}b\text{-P}(\text{MPC}_{17}\text{-}st\text{-NHSMA}_2)\text{-FITC}$ microparticles | 1437                        |
| $\text{PLA}_{114}\text{-}b\text{-P}(\text{MPC}_{17}\text{-}st\text{-CysMA}_2)\text{-FITC}$ microparticles | 5167                        |
| Nude $\text{PLA}_{114}\text{-}b\text{-P}(\text{MPC}_{17}\text{-}st\text{-CysMA}_2)$ microparticles        | 3                           |

**Figure S5.** Fluorescence data of FITC attachment to cysteine (thiol)-functionalized  $\text{PLA}_{114}\text{-}b\text{-P}(\text{MPC}_{17}\text{-}st\text{-CysMA}_2)$ , NHS-functionalized  $\text{PLA}_{114}\text{-}b\text{-P}(\text{MPC}_{17}\text{-}st\text{-NHSMA}_2)$  and nude thiol-functionalized  $\text{PLA}_{114}\text{-}b\text{-P}(\text{MPC}_{17}\text{-}st\text{-CysMA}_2)$  polymer microparticles for comparison.
